# Supplementary material
Source: PubMed Central journal article supplement (PMC524765)
Supplement: mbc_E04-05-0411_1.pdf [file mbc_E04-05-0411_1.pdf]

---

Table S1: Description of genes in this analysis

---

| Gene             | Description (Proteome Database)                                                                                                                                                                                              |
|------------------|------------------------------------------------------------------------------------------------------------------------------------------------------------------------------------------------------------------------------|
| <i>ARF1</i>      | GTP-binding protein involved in assembly of coated vesicles of the secretory system, member of the Arf family in the Ras superfamily                                                                                         |
| <i>ARF2</i>      | GTP-binding protein of the Arf family (Ras superfamily) involved in assembly of coated vesicles of the secretory system                                                                                                      |
| <i>BFR1</i>      | Protein that suppresses brefeldin A-induced lethality when overproduced, may be involved in mRNA metabolism                                                                                                                  |
| <i>COP1</i>      | Coatmer (COPI) complex $\alpha$ chain ( $\alpha$ -COP) of secretory pathway vesicles required for retrograde Golgi to endoplasmic reticulum transport, member of WD (WD-40) repeat family                                    |
| <i>GCS1</i>      | GTPase-activating protein (GAP) for ADP-ribosylation factors Arf1p and Arf2p, involved in endocytosis, exocytosis, secretion, and mitochondrial and vacuolar organization, member of the Gcs1p/Glo3p/Sps18p family           |
| <i>GEA2</i>      | Component of complex with guanine-nucleotide-exchange activity for ARF                                                                                                                                                       |
| <i>GGA2</i>      | Protein involved in trafficking of proteins between the trans-Golgi network and the vacuole                                                                                                                                  |
| <i>GLO3</i>      | GTPase-activating protein (GAP) for ADP-ribosylation factors Arf1p and Arf2p, involved in retrograde transport between Golgi and ER as well as endocytosis                                                                   |
| <i>MYO4/SHE1</i> | Myosin heavy chain, class V                                                                                                                                                                                                  |
| <i>PAB1</i>      | Poly(A)-binding protein of cytoplasm and nucleus, part of the 3'-end RNA-processing complex (cleavage factor I), involved in translation termination with Sup35p, has 4 RNA recognition (RRM) domains                        |
| <i>PUB1</i>      | Major polyadenylated RNA-binding protein of nucleus and cytoplasm, contains three RNA recognition (RRM) domains and three Gln/Asn-rich regions                                                                               |
| <i>SAR1</i>      | Component of COPII coat of vesicles involved in endoplasmic reticulum to Golgi transport, GTP-binding protein of the Arf family in the Ras superfamily                                                                       |
| <i>SCP160</i>    | Protein involved in control of mitotic chromosome transmission, acts as an effector for Gpa1p in the mating response pathway, contains 14 KH domains which are found in RNA-binding proteins such as Mer1p and mouse hnRNP X |

---

---

|                  |                                                                                                                                                                                                     |
|------------------|-----------------------------------------------------------------------------------------------------------------------------------------------------------------------------------------------------|
| <i>SEC18</i>     | Protein required for fusion of vesicles to target membranes as well as for vacuolar fusion, homolog of mammalian NSF protein, member of the AAA family of ATPases                                   |
| <i>SEC21</i>     | Coatmer (COPI) complex $\gamma$ chain ( $\gamma$ -COP) of secretory pathway vesicles, required for retrograde Golgi to endoplasmic reticulum transport                                              |
| <i>SEC23</i>     | Component of COPII coat of vesicles involved in endoplasmic reticulum to Golgi transport, has GTPase-activation (GAP) activity for Sar1p                                                            |
| <i>SEC26</i>     | Coatmer (COPI) complex $\beta$ chain ( $\beta$ -COP) of secretory pathway vesicles, required for retrograde transport from Golgi to endoplasmic reticulum                                           |
| <i>SEC27</i>     | Coatmer (COPI) complex $\beta'$ chain ( $\beta'$ -COP) of secretory pathway vesicles, required for retrograde transport from Golgi to endoplasmic reticulum, member of the WD (WD-40) repeat family |
| <i>SEC28</i>     | Coatmer (COPI) complex $\epsilon$ chain ( $\epsilon$ -COP) of secretory pathway vesicles, required for retrograde transport from Golgi to endoplasmic reticulum                                     |
| <i>SEC7</i>      | Component of non-clathrin vesicle coat required for protein trafficking within the Golgi                                                                                                            |
| <i>SHE2</i>      | RNA-binding protein involved in localization of <i>ASH1</i> mRNA, required for mother cell-specific expression of HO                                                                                |
| <i>SHE3</i>      | Protein involved in localization of <i>ASH1</i> mRNA, required for mother cell-specific expression of HO                                                                                            |
| <i>SPB8/LSM1</i> | Protein of the Sm class of RNA-binding proteins involved in control of mRNA decay, involved in sensitivity to UV irradiation                                                                        |

---
